# Supplementary material
Source: PubMed Central journal article supplement (PMC7391142)

## Supplemental Data

### **Supplemental Figure Legends:**

#### **Supplemental Figure 1. Comparison of EFS between FISH groups.**

(A) Event-free survival curves comparing wild-type group with extra copy groups. (B) Event-free survival curves comparing wild-type with double hit group. (C) Event-free survival curves comparing extra copy with double hit group.

**Supplemental Figure 2. Kaplan-Meier curves of advanced stage (Stage III-IV) subgroups.** (A) Event-free survival. (B) Overall Survival. (C) Event-free survival comparison of all three FISH groups. (D) Overall survival comparison of all three FISH groups

**Supplemental Figure 3. Kaplan-Meier curves of six treatment/FISH subgroups.** (A) Event-free survival. (B) Overall Survival

**Supplemental Figure 4. Kaplan-Meier curves of extra copy subgroup stratified by amplification status.** (A) Event-free survival. (B) Overall Survival

Supplemental Figures:

Supplemental Figure 1

**A**

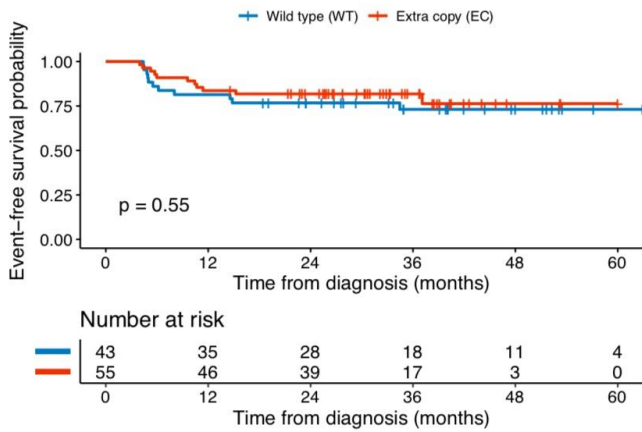

**B**

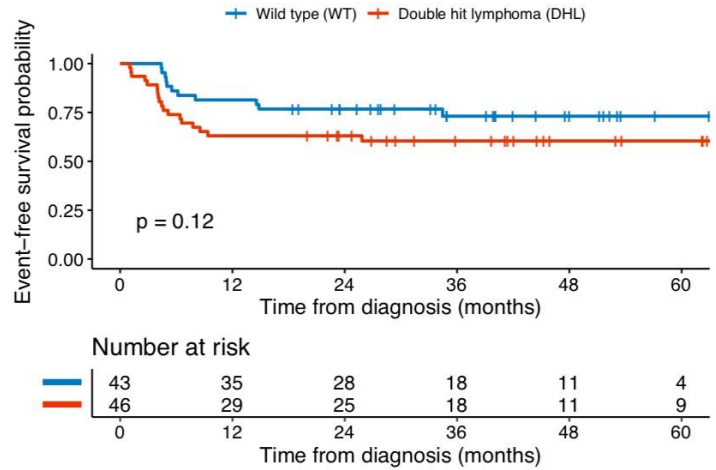

**C**

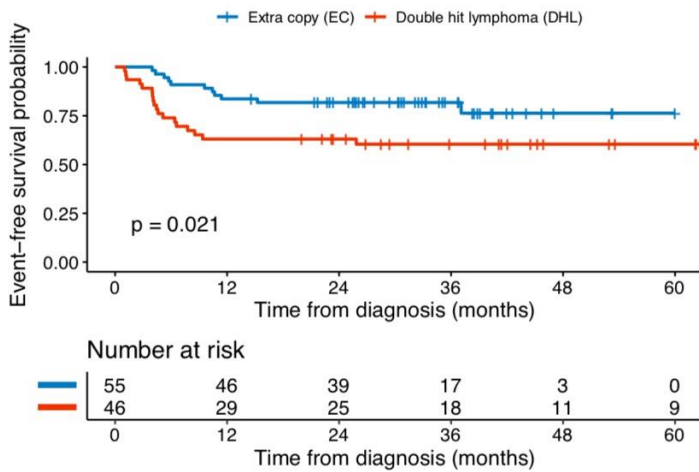

## Supplemental Figure 2

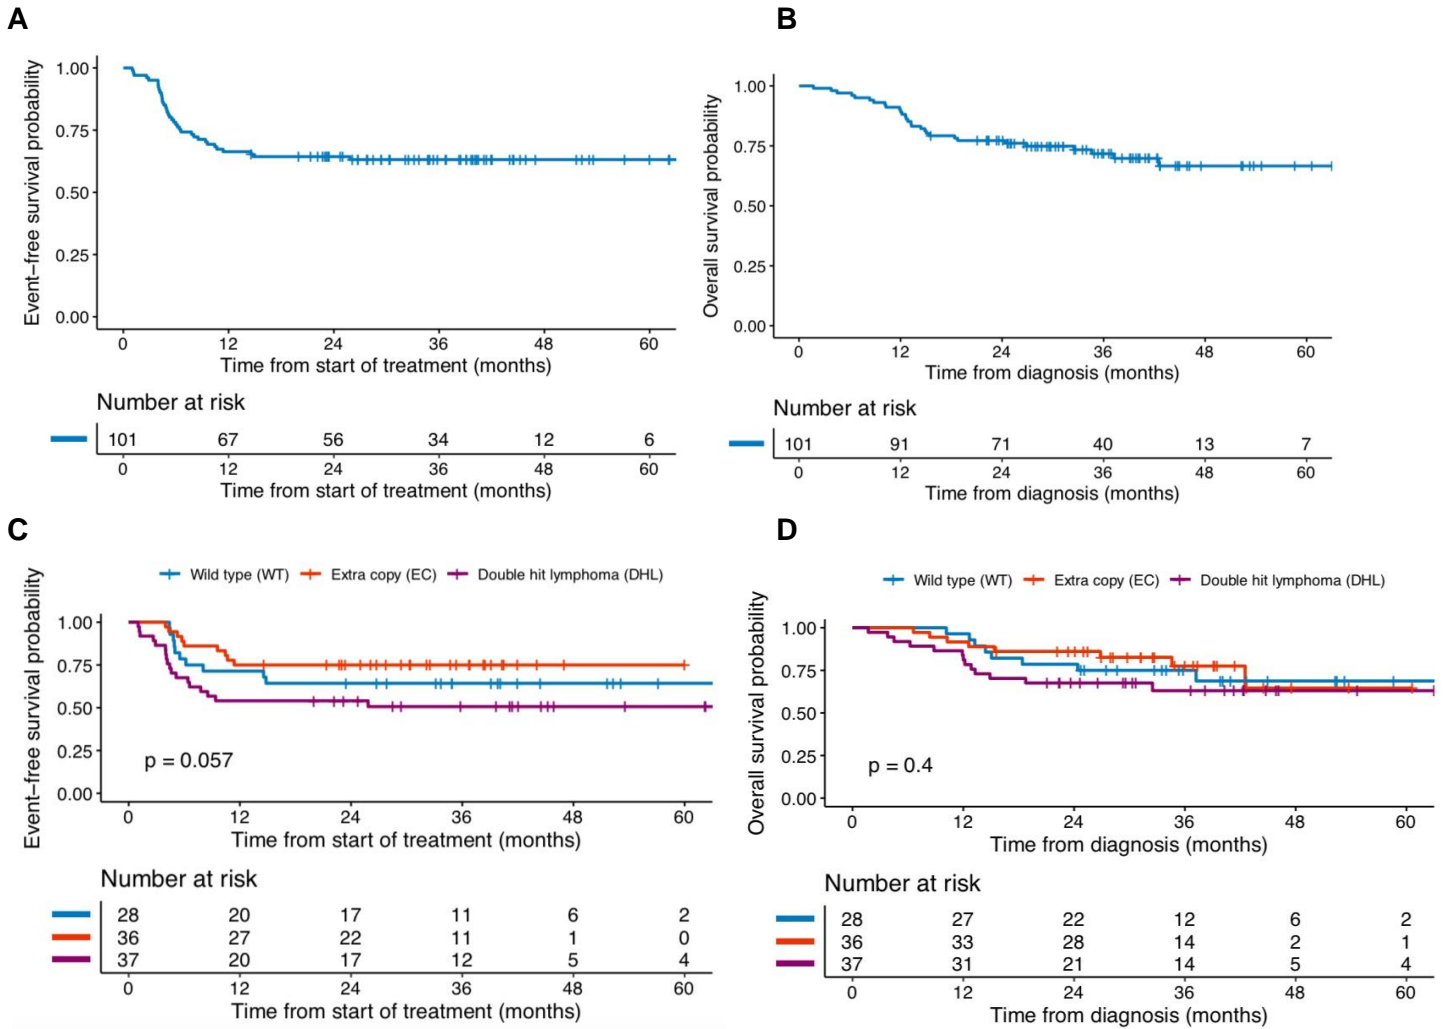

### Supplemental Figure 3

**A**

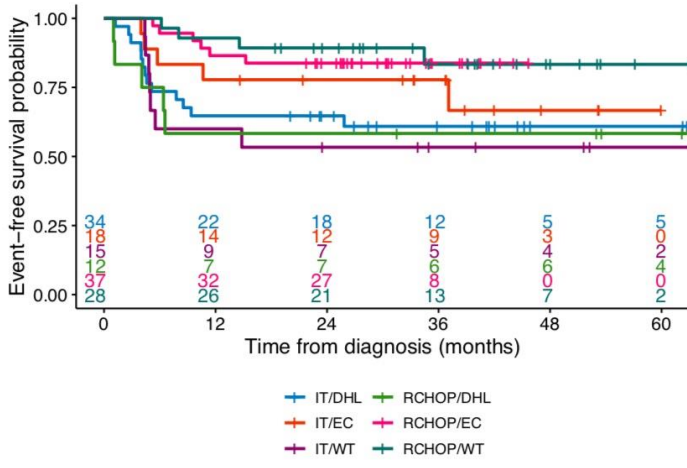

**B**

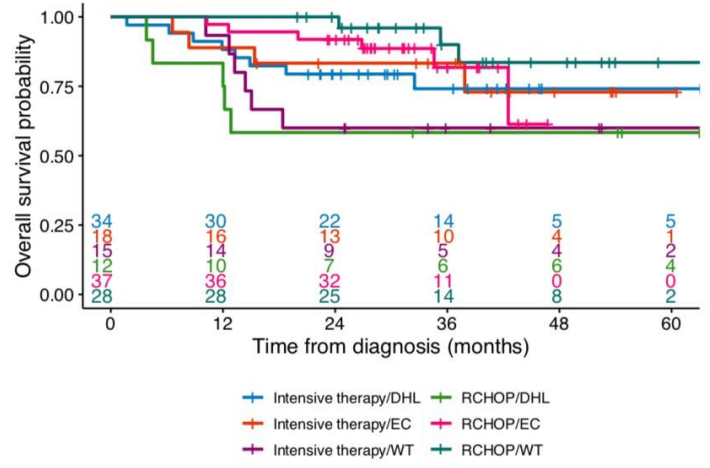

## Supplemental Figure 4

**A**

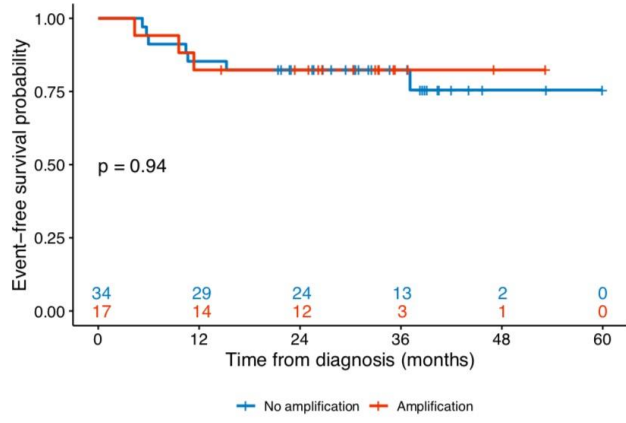

**B**

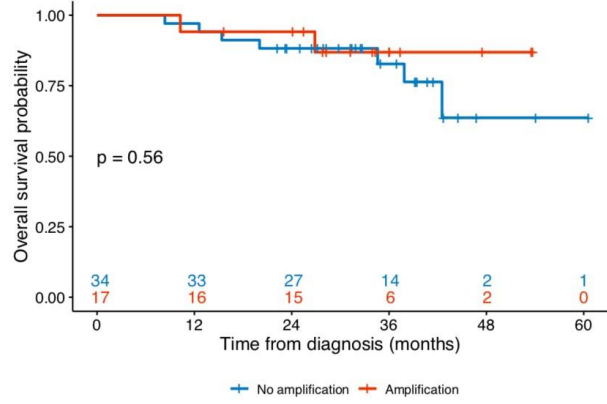

Supplement: advancesADV2020001551-suppl1.pdf [file advancesADV2020001551-suppl1.pdf]
